# Supplementary material
Source: Springer Nature journal article supplement (https://www.springermedizin.de/resource/supplementary/12958_2012_983_MOESM3_ESM.pdf/9566560)

**A****HTF**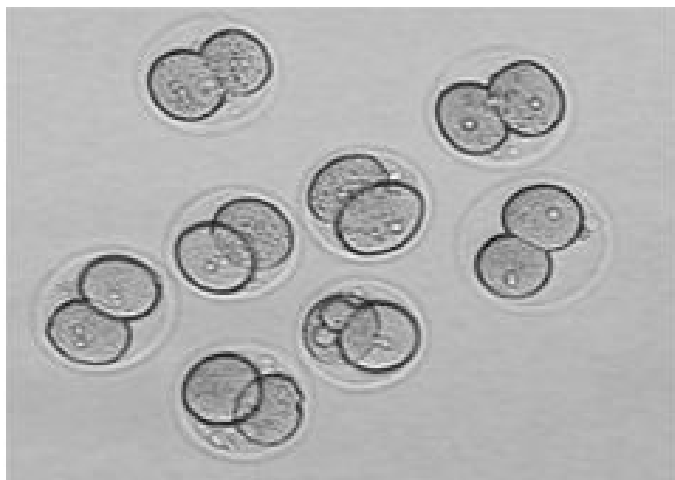**HTF+Dkk1 antibody**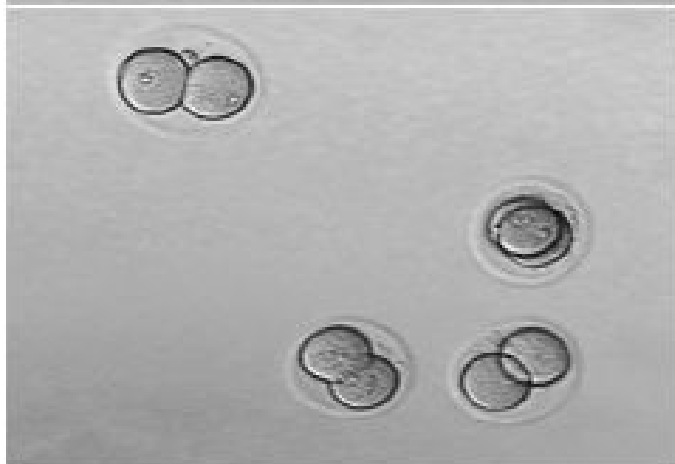**B****Fertilization rate(%)**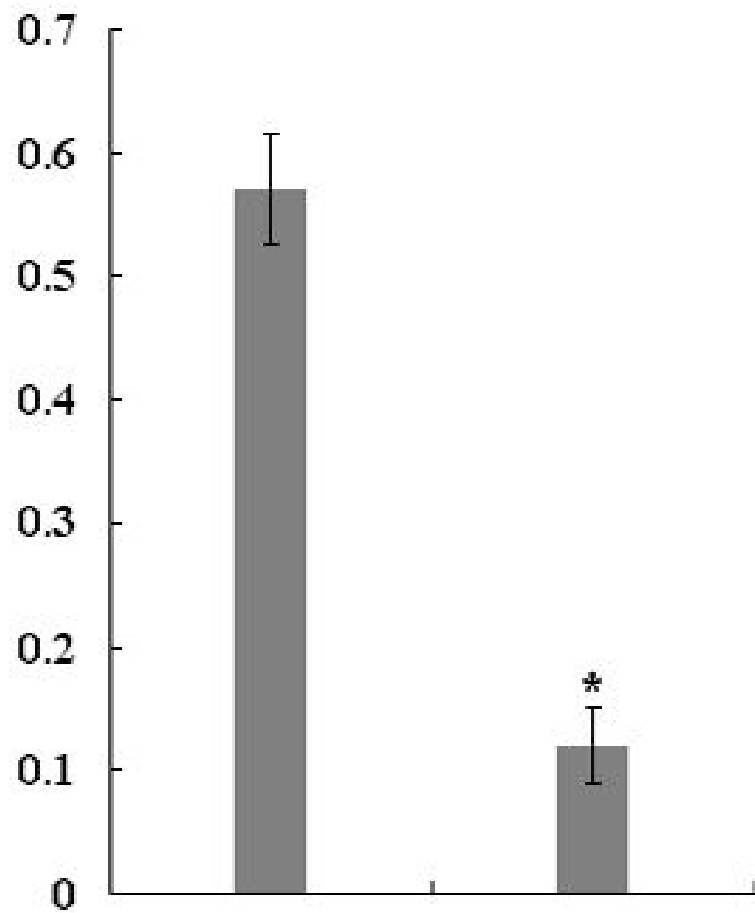**HTF****HTF+Dkk1  
antibody**

Supplement: MOESM3 [file 9566560]
